# Supplementary material for: Transitioning to a Circular Economy: A Systematic Review of Its Drivers and Barriers
Source: MDPI journal article supplement (doi:10.3390/su14031757), 2022-02-03
Supplement: s1 [file s1]

## List of Included Works

Supplementary Material for "Transitioning to a Circular Economy: A Systematic Review of its Drivers and Barriers"  
by Jovan Tan, Fabien Jianwei Tan & Seeram Ramakrishna in MDPI Sustainability.

| S/N | Authors (Date)                     | Title                                                                                                                                                            | Type of Work     | Key Points                                                                                                                                                                                          | Reason for Inclusion                                                                                    |
|-----|------------------------------------|------------------------------------------------------------------------------------------------------------------------------------------------------------------|------------------|-----------------------------------------------------------------------------------------------------------------------------------------------------------------------------------------------------|---------------------------------------------------------------------------------------------------------|
| 1   | OECD (2020)                        | Assessing and unlocking the circular economy in Groningen, Netherlands                                                                                           | Book Chapter     | Challenges of a circular economy in 3 areas, Public Procurement, Waste Management, Technical Knowledge; Main Barriers: Silo based approaches, low communication, poor cost-benefit analysis         | Region specific insights                                                                                |
| 2   | Zucchella, A. (2019)               | The Growth of Circular Entrepreneurship: An Integrative Model                                                                                                    | Book Chapter     | Identifying enabling conditions for rise and growth of circular enterprises; Internal factors: resources and capabilities; External factors: institutional enablers which supports circular economy | Comprehensive insights                                                                                  |
| 3   | Awan, U. et al. (2021)             | Industry 4.0 and the circular economy: A literature review and recommendations for future research                                                               | Research Article | Identifying how Internet of Things (IOT) can be part of the circular economy and stakeholder interests are affected by understanding government, suppliers, and organization interests.             | Good foresight on relationship between technology and CE                                                |
| 4   | Kirchherr, K. , et al. (2018)      | Barriers to the Circular Economy - Evidence from the European Union                                                                                              | Research Article | Low consumer awareness, hesitant firm culture, lack of supportive frameworks.                                                                                                                       | Region specific insights                                                                                |
| 5   | De Jesus, A. , Mendonca, S. (2018) | Lost in Transition? Drivers and Barriers in the Eco-innovation Road to the Circular Economy                                                                      | Research Article | High price costs, steep learning curves, slow consumer preferences, increased resource consumption. More support for R&D.                                                                           | Comprehensive insights                                                                                  |
| 6   | Kapsalis, V. C. , et al. (2019)    | Investigation of Ecosystem Services and Circular Economy Interactions under an Inter-organizational Framework                                                    | Review Article   | Labor, time preference for consumers to change, firm liquidity constraints, cultural constraints.                                                                                                   | Good understanding of micro perspective (firms)                                                         |
| 7   | Garcés-Ayerbe, C. , et al. (2019)  | Is It Possible to Change from a Linear to a Circular Economy? An Overview of Opportunities and Barriers for European Small and Medium-Sized Enterprise Companies | Research Article | Complex procedures towards circularity, fundings for circular projects not well defined, high costs, lack of technically skilled workers.                                                           | Comprehensive insights                                                                                  |
| 8   | Min, Z. et al. (2021)              | Proposing Circular Economy Ecosystem for Chinese SMEs: A Systematic Review                                                                                       | Review Article   | Lack of innovation, short SME market survival time, More exposure towards sustainability, strategic MNC and SME partnerships.                                                                       | <i>[Exception Article]</i><br>Region specific insights, In-depth understanding of firm culture in China |
| 9   | Hesmati A. (2017)                  | A Review of the Circular Economy and its Implementation                                                                                                          | Review Article   | Low resource endowments, low consumer awareness.                                                                                                                                                    | Comprehensive insights                                                                                  |

|    |                                           |                                                                                                                                                          |                  |                                                                                                                                                                                  |                                                                                                                                        |
|----|-------------------------------------------|----------------------------------------------------------------------------------------------------------------------------------------------------------|------------------|----------------------------------------------------------------------------------------------------------------------------------------------------------------------------------|----------------------------------------------------------------------------------------------------------------------------------------|
| 10 | Govindan, K. ,<br>Hasanagic, M.<br>(2018) | A systematic review on<br>drivers, barriers, and<br>practices towards circular<br>economy: a supply chain<br>perspective                                 | Review Article   | Lack of performance assessment frameworks for CE efforts, lack of<br>support from top management, Supportive laws and regulations for<br>clean production and consumption.       | Comprehensive insights                                                                                                                 |
| 11 | Whicher, A. , et<br>al. (2017)            | Design for circular economy:<br>Developing an action plan for<br>Scotland                                                                                | Research Article | Aligning market and government needs, financial support, skillset<br>training, driving change towards circular economy in Europe.                                                | Region specific insights                                                                                                               |
| 12 | Rossi, E. , et al.<br>(2020)              | Circular economy indicators<br>for organizations considering<br>sustainability and business<br>models: Plastic, textile, and<br>electro-electronic cases | Research Article | Identifying indicators which help drive businesses towards circular<br>economy, identify potential areas of importance to increase CE<br>performance.                            | Comprehensive insights                                                                                                                 |
| 13 | Ormazabal, M. et<br>al. (2018)            | Circular Economy in Spanish<br>SMEs: Challenges and<br>opportunities                                                                                     | Research Article | Inadequate information system management, increased prestige from<br>driving CE activities in businesses, gaining alternative revenues<br>from remanufacturing and recycling.    | Region specific insights                                                                                                               |
| 14 | Zhang A. , et al.<br>(2019)               | Barriers to smart waste<br>management for a circular<br>economy in China                                                                                 | Research Article | Lack of innovative culture, stakeholder cooperation, proper<br>standards for CE initiatives, pursuing short term profits instead of<br>long-term sustainability.                 | Region specific insights                                                                                                               |
| 15 | Fan, V. Y. , et al.<br>(2019)             | Cross-disciplinary<br>approaches towards smart,<br>resilient, and sustainable<br>circular economy                                                        | Research Article | Environmental taxes, building more awareness towards climate<br>change and sustainability.                                                                                       | Comprehensive insights                                                                                                                 |
| 16 | Staicu, D. , Pop,<br>O. (2018)            | Mapping the interactions<br>between the stakeholders of<br>the circular economy<br>ecosystem applied to the<br>textile and apparel sector in<br>Romania  | Research Article | Negative perceptions towards sustainability, stakeholders do not feel<br>empowered to change, lack of opportunities to specialize in CE<br>skillsets.                            | <i>[Exception Article]</i><br>Insightful regional and<br>Industry specific factors<br>and good analysis on<br>stakeholder mentality    |
| 17 | Laubinger, F. , et<br>al. (2020)          | Labor market consequences<br>of a transition to a circular<br>economy: A review paper                                                                    | Review Article   | Using resource efficient policies to shift away from linear business<br>models, utilizing demand patterns and macroeconomic conditions to<br>analyze CE changes in labor market. | In depth analysis of<br>relationship between<br>labor market and CE                                                                    |
| 18 | Galvão, G.D.A ,<br>et al. (2018)          | Circular economy: overview<br>of barriers                                                                                                                | Review Article   | Poor management drive, lack of societal pressure towards<br>sustainability issues.                                                                                               | Comprehensive insights                                                                                                                 |
| 19 | Mangla S. K. , et<br>al (2018)            | Barriers to effective circular<br>supply chain management in<br>a developing country context                                                             | Research Article | Complexity within supply chains, lack of environmental laws for<br>polluted sectors, poor demand for superior technologies.                                                      | Insightful analysis on<br>developing countries                                                                                         |
| 20 | Khan, O. et al.<br>(2020)                 | Assessing the determinants<br>of intentions and behaviors of<br>organizations towards a<br>circular economy for plastics                                 | Research Article | Differing consumer actions, regulatory and market pressure towards<br>CE efforts.                                                                                                | <i>[Exception Article]</i><br>Industry specific<br>insights on<br>opportunities and<br>constraints for specific<br>material (plastics) |

|    |                                                         |                                                                                                                                |                  |                                                                                                                                                                                                                                                      |                                             |
|----|---------------------------------------------------------|--------------------------------------------------------------------------------------------------------------------------------|------------------|------------------------------------------------------------------------------------------------------------------------------------------------------------------------------------------------------------------------------------------------------|---------------------------------------------|
| 21 | Huang B. et al. (2018)                                  | Construction and demolition waste management in China through the 3R principle                                                 | Research Article | Low cost for businesses to dispose waste inappropriately, lack of guidance for proper waste management, immature recycling technologies and underdeveloped facilities.                                                                               | Industry specific insights                  |
| 22 | Ranta V. et al. (2018)                                  | Exploring institutional drivers and barriers of the circular economy: A cross regional comparison of China, the US, and Europe | Research Article | Firms rejecting CE business models due to familiarity and lower cost of linear models, differing regulations across states, CE initiatives are deemed low value, underdeveloped technology.                                                          | In-depth cross regional insights            |
| 23 | Farooque, M. , Zhang A. , Liu, Y. P. (2019)             | Barriers to food supply chain in China                                                                                         | Research Article | Weak environmental regulations, lack of enforcement towards pollution, lack of market/societal pressure towards CE activities.                                                                                                                       | Industry specific insights                  |
| 24 | Alhawari, O. et al. (2021)                              | Insights from Circular Economy Literature: A Review of Extant Definitions and Unravelling Paths to Future Research             | Review Article   | Using new technology to drive resource efficiency, collaboration and information sharing between businesses help to drive exchange of new ideas and solutions.                                                                                       | Comprehensive insights                      |
| 25 | Rizos V., et al. (2016)                                 | Implementation of circular economy business models by small and medium-sized enterprises (SMEs): Barriers and enablers         | Research Article | Risk adversity towards CE transition, lack of supportive frameworks, enabling company culture, cross firm technological knowledge transfer.                                                                                                          | Comprehensive insights                      |
| 26 | Oghazi P, Mostaghel R. (2018)                           | Circular business models and challenges and lessons learned from Industrial perspective                                        | Research Article | Risk adversity, low consumer awareness, risk of cannibalism from firms, lack of resources to develop innovative products and solutions.                                                                                                              | Comprehensive insights                      |
| 27 | Valache-Altinell, C. , Wachholz, C. Engström, M. (2021) | A low carbon and circular economy for Europe                                                                                   | Policy Paper     | Stakeholders with conflicting interests, the need to enhance transparency and communication among businesses, innovative urban planning.                                                                                                             | Region specific insights                    |
| 28 | Goyal, S. , Esposito, M. , Kapoor, A. (2016)            | Circular economy business models in developing economies: Lessons from India on reduce, recycle, and reuse paradigms           | Research Article | Infrastructure barriers which include inefficient recycling systems, under focused and underdeveloped capabilities, ecosystem for awareness and adoption of integrated technologies is lacking. Ineffective policies and lack of governmental focus. | Insightful analysis on developing countries |
| 29 | Tura N. et al. (2019)                                   | Unlocking circular business: A framework of barriers and drivers                                                               | Review Article   | Hierarchical system of firms impede change, some industries still favor linear economy approaches, Identifying new synergies to create value and reduce dependency on linear supply chain.                                                           | Comprehensive insights                      |
| 30 | Farooque, M. et al. (2019)                              | Circular supply chain management: A definition and structured literature review                                                | Review Article   | Utilizing cost efficiency frameworks to support adoption of CE, improving customer value propositions, the need for research on barriers and drivers to be contextualized.                                                                           | Comprehensive insights                      |
| 31 | Caldera, H.T.S, Desha, C. , Dawes, L. (2019)            | Evaluating the enablers and barriers for successful implementation of                                                          | Research Article | Negative attitudes towards CE, lack of technological skillsets, aligning organizations and stakeholders with green goals.                                                                                                                            | Comprehensive insights                      |

|    |                                                                         |                                                                                                                                               |                  |                                                                                                                                                                                                                                                                                                                       |                                                                                                                                     |
|----|-------------------------------------------------------------------------|-----------------------------------------------------------------------------------------------------------------------------------------------|------------------|-----------------------------------------------------------------------------------------------------------------------------------------------------------------------------------------------------------------------------------------------------------------------------------------------------------------------|-------------------------------------------------------------------------------------------------------------------------------------|
|    |                                                                         | sustainable business practice in 'lean' SMEs                                                                                                  |                  |                                                                                                                                                                                                                                                                                                                       |                                                                                                                                     |
| 32 | Kiefer, C.P. ,<br>González, P.D-R,<br>Carrillo-Hermosilla, J.<br>(2018) | Drivers and barriers of eco-innovation types for sustainable transitions A quantitative perspective                                           | Research Article | Resources and capabilities receive the lowest attention from firm analysis, involvement in green supply chains, technology push and market pull are the drivers for eco-innovation.                                                                                                                                   | Comprehensive insights                                                                                                              |
| 33 | Hart, J. et al.<br>(2019)                                               | Barriers and drivers in a circular economy The case of the built environment                                                                  | Review Article   | Lack of understanding across the business value chain, obstructing laws and regulations, technical challenges towards material recovery and infrastructure development.                                                                                                                                               | Comprehensive insights                                                                                                              |
| 34 | Linder M. ,<br>Williander, M.<br>(2017)                                 | Circular Business Model Innovation: Inherent Uncertainties                                                                                    | Research Article | Pilot study results: Collaboration between partners was viewed as a critical issue, but resolved in the later stages. Mainly operational risks.                                                                                                                                                                       | Comprehensive insights                                                                                                              |
| 35 | Ritzén, S. ,<br>Sandström, G.Ö.<br>(2017)                               | Barriers to the Circular Economy – integration of perspectives and domains                                                                    | Research Article | Difficulty in measuring financial benefits of CE, Risk aversion, Differing perceptions of sustainability.                                                                                                                                                                                                             | Comprehensive insights                                                                                                              |
| 36 | Su. B , et al.<br>(2013)                                                | A review of the circular economy in China: moving from rhetoric to implementation                                                             | Review Article   | Weak economic incentives, poor implementations, lack of consumer awareness, lack of proper assessment.                                                                                                                                                                                                                | <i>[Exception Article]</i><br>In depth analysis of firm culture in China and offers a good benchmark for China's current CE efforts |
| 37 | Masi. D. , et al.<br>(2018)                                             | Towards a more circular economy: exploring the awareness, practices, and barriers from a focal firm perspective                               | Research Article | three levels of initiatives; micro firms, meso networks, macro policies. Firms more likely to participate in resource efficiency and reduction practices rather than recovery, i.e., remanufacturing or recycling to close the loop. Lack of awareness and sense of urgency from management levels.                   | Alternative perspective towards approaching CE on different levels                                                                  |
| 38 | van Buren N. , et al<br>(2016)                                          | Towards a circular economy: The role of Dutch logistics industries and governments                                                            | Research Article | Institutional barriers such as different interpretations and enforcement in transport of waste material in EU. Economic barriers such as vested interests by certain firms. Prices of raw materials is cheaper than recycled materials.                                                                               | Region specific insights                                                                                                            |
| 39 | Ferronato. N. , et al<br>(2019)                                         | Introduction of the circular economy within developing regions: A comparative analysis of advantages and opportunities for waste valorization | Research Article | Comparing CE participation opportunities for Romania and Bolivia in their solid waste management. Factors include the need to change public recycling perceptions and participation rate, the need for investment opportunities into waste management industry to help support informal recycling efforts in country. | Insightful analysis on developing countries                                                                                         |
| 40 | Camacho-Otero, J. et al<br>(2018)                                       | Consumption in the circular economy: A literature review                                                                                      | Research Article | Theme of nature, meaning, and dynamics of circular consumer consumption is relatively unaddressed. Product design, lifespan is critical for firms to consider trying and change consumer preferences. Hard to create symbolic value aside from utility value for consumers to choose sustainable products.            | Comprehensive insights                                                                                                              |
| 41 | Hartley K. et al<br>(2020)                                              | Policies for transitioning towards a circular economy:                                                                                        | Research Article | Influencing the change in consumption preferences and attitudes. Converging the values of consumers and producers together. Done through collaboration with stakeholders instead of top-down                                                                                                                          | Region specific insights                                                                                                            |

|    |                                        |                                                                                                                            |                  |                                                                                                                                                                                                                                                                                                                                                          |                                                                                              |
|----|----------------------------------------|----------------------------------------------------------------------------------------------------------------------------|------------------|----------------------------------------------------------------------------------------------------------------------------------------------------------------------------------------------------------------------------------------------------------------------------------------------------------------------------------------------------------|----------------------------------------------------------------------------------------------|
|    |                                        | Expectations from the European Union (EU)                                                                                  |                  | approach. Liberalizing waste material trading to widen the manufacturing of recycled products                                                                                                                                                                                                                                                            |                                                                                              |
| 42 | Diaz Lopez, F.J. , et al (2019)        | Business Model Innovation for Resource-efficiency, Circularity and Cleaner Production: What 143 Cases Tell Us              | Research Article | Barriers towards resource efficiency measures fiscal and regulatory restrictions, market monopoly, misdirected focus of social systems (company goals, strategies).                                                                                                                                                                                      | Comprehensive insights                                                                       |
| 43 | Hahladakis J.N. , Iacovidou, E. (2019) | An overview of the challenges and trade-offs in closing the loop of post-consumer plastic waste (PCPW): Focus on recycling | Review Article   | Lower income countries in the Global South often have underdeveloped facilities for recycling. Informal recycling efforts are affected by price fluctuations. Sorting process requires large amount of manual labor to separate non-polymers from plastic waste. Product design at start-of-life prevents proper recycling to take place in end-of-life. | Industry specific insights on opportunities and constraints for specific material (plastics) |
| 44 | Guldmann, E. ,Huulgaard, R.D. (2020)   | Barriers to circular business model innovation: A multiple-case study                                                      | Research Article | Public procurements are cost driven and not sustainability driven. Complex value chains, firm cannibalization, prevailing linear business models together with strong supportive policies/measures that support linear models.                                                                                                                           | Comprehensive insights                                                                       |
| 45 | Kumar V. , et al (2019)                | Circular economy in the manufacturing sector: benefits, opportunities, and barriers                                        | Review Article   | Creating employment opportunities, advancing social value and quality of life for consumers. Enhancing profitability for firms as product end-of-life is managed. Low demand for remanufactured products as consumers pays attention to appearance and face value. Limited incentives to move towards material and energy savings.                       | Comprehensive insights                                                                       |
| 46 | Masi, D. et al (2017)                  | Supply chain configurations in the circular economy: A systematic literature review                                        | Review Article   | Technologies in linear business models are well funded and supported compared to circular business models. Current green tech leverages on rare earth materials, need to develop breakthroughs in research.                                                                                                                                              | Comprehensive insights                                                                       |
| 47 | Gusmerotti N.M. , et al (2019)         | Drivers and approaches to the circular economy in manufacturing firms                                                      | Research Article | Regulations work as an external signal to help redirect the focus of managers and business leaders. Economic efficiency and supply chain related risks are significant.                                                                                                                                                                                  | Comprehensive insights                                                                       |
| 48 | Moktadir, M. A. , et al (2018)         | Drivers to sustainable manufacturing practices and circular economy: A perspective of leather industries in Bangladesh     | Review Article   | Scarcity of available information for developing countries like Bangladesh. Misaligned knowledge between stakeholders. Preventing economic uncertainties through competent thought leadership.                                                                                                                                                           | Industry specific and insightful analysis on developing countries                            |
| 49 | Lewandowski, M. (2016)                 | Designing the business models for circular economy-towards the conceptual framework                                        | Review Article   | Barriers include HR constraints (team goal alignment), political systems, IT, business risks. Enablers include thought leadership, firm collaboration. Evaluation of circular business models have to be targeted towards micro, meso, and macro.                                                                                                        | Comprehensive insights                                                                       |
| 50 | Tunn, V.S.C. et al (2019)              | Business models for sustainable consumption in the circular economy: An expert study                                       | Research Article | Cycling products and materials to achieve sustainable resource strategy. Mixed views on success on consumer/company driven CE. Changing business model to stabilize consumption levels                                                                                                                                                                   | Comprehensive insights                                                                       |
| 51 | Hopkinson, P. et al (2018)             | Managing a Complex Global Circular Economy Business                                                                        | Research Article | Opportunities: Optimal pricing strategies, driving consumer acceptance, creating product value and design beyond utility.                                                                                                                                                                                                                                | Comprehensive insights                                                                       |

|  |  |                                     |  |                                                                                                                |  |
|--|--|-------------------------------------|--|----------------------------------------------------------------------------------------------------------------|--|
|  |  | Model: Opportunities and Challenges |  | Barriers: Waste/remanufactured product import prohibitions, foreign tariffs, high price of recycled materials. |  |
|--|--|-------------------------------------|--|----------------------------------------------------------------------------------------------------------------|--|
